# Supplementary material for: Conditions that promote transcellular neutrophil migration in vivo
Source: PubMed Central journal article supplement (PMC11196655; doi:10.1038/s41598-024-65173-3), 2024-06-24
Supplement: 41598_2024_65173_MOESM1_ESM.pdf [file 41598_2024_65173_MOESM1_ESM.pdf]

## Conditions that promote transcellular neutrophil migration in vivo

Min Xia, Rebekka I. Stegmeyer, Keisuke Shirakura, Stefan Butz, Aude Thiriot, Ulrich H. von Andrian and Dietmar Vestweber

### Supplemental Fig. S1

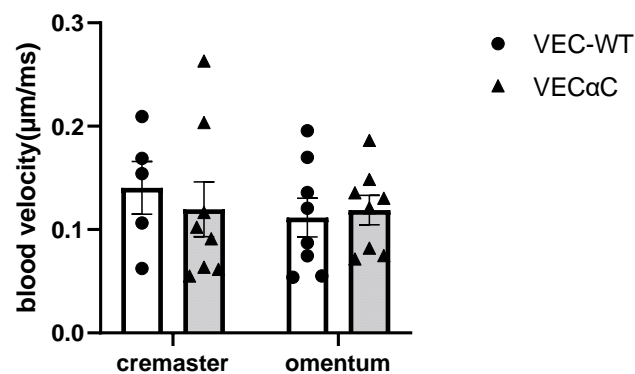

#### Supplemental Fig. S1: Blood velocity measurement.

Blood flow velocity was determined in venules (diameter 60-85 µm) of the cremaster and omentum of VEC-WT and VEC-alphaC mice as described in Materials & Methods.

Data were determined from at least 5 mice per group and are presented as mean ± SEM.
